# Supplementary material for: Self-propulsion of a catalytically active particle near a planar wall: from reflection to sliding and hovering
Source: Royal Society of Chemistry journal article supplement (doi:10.1039/c4sm02317j), 2014-11-19
Supplement: c4sm02317j1.pdf [file c4sm02317j1.pdf]

# Supplemental Information for “Self-propulsion of a catalytically active particle near a planar wall: from reflection to sliding and hovering”

William E. Uspal,<sup>1,2</sup> Mihai N. Popescu,<sup>1,2,3</sup> Siegfried Dietrich,<sup>1,2</sup> and Mykola Tasinkevych<sup>1,2</sup>

<sup>1</sup>Max-Planck-Institut für Intelligente Systeme, Heisenbergstr. 3, D-70569 Stuttgart, Germany

<sup>2</sup>IV. Institut für Theoretische Physik, Universität Stuttgart,  
Pfaffenwaldring 57, D-70569 Stuttgart, Germany

<sup>3</sup>Ian Wark Research Institute, University of South Australia, Adelaide, SA 5095, Australia

(Dated: November 12, 2014)

## I. CALCULATION OF THE TRANSLATIONAL AND THE ROTATIONAL VELOCITIES OF SELF-PROPELLED PARTICLES

Due to effective solute-particle interactions acting within a thin boundary layer surrounding the particle with a thickness  $\delta \ll R, h$ , which is comparable with the range of the interactions, the non-uniform distribution of solute around the colloid drives a surface flow of the solution consisting of solvent and solute. Perpendicular to the particle surface, this flow field characteristically varies over the small length  $\delta$ . Therefore, it can be modeled as an effective phoretic slip velocity  $\mathbf{v}_s = -b(\mathbf{r})\nabla_{||}c(\mathbf{r})$ , where  $\nabla_{||} = (\mathbf{1} - \mathbf{nn}) \cdot \nabla$  is the projection of the gradient onto the particle surface [1, 2], with  $\mathbf{n}$  denoting the surface normal oriented towards the fluid. The quantity  $b(\mathbf{r})$  is a so-called “surface mobility” determined by the effective interaction between the product and the particle surface [1, 2]. Except where indicated, we take  $b(\mathbf{r})$  to be uniform over the surface:  $b(\mathbf{r}) = b$ . The sign of  $b$  tells whether the product is effectively repelled or attracted by the particle. Here we analyze in detail the case of repulsive interactions, i.e.,  $b < 0$  and briefly summarize the changes occurring in the case of attractive interactions.

Under the assumption that a quasi-steady state establishes fast, and for sufficiently small self-propulsion velocities  $\mathbf{U}$  and  $\mathbf{\Omega}$  (see below), the number density  $c(\mathbf{r})$  is governed by the Laplace equation  $D\nabla^2c = 0$ , with the boundary conditions  $\partial c/\partial n = 0$  on the planar wall,  $\partial c/\partial n = 0$  on the inert surface of the colloid, and  $-D(\partial c/\partial n) = \kappa$  on the catalytic cap.  $D$  is the diffusion coefficient of the product molecules, i.e., solute, and the constant  $\kappa$  is the flux of product molecules per area emanating from the cap. The last boundary condition corresponds to the so-called “constant flux” condition for which the turnover rate of the catalytic reaction is independent of the local concentration of the reactant (as it is, e.g., the case for a Michaelis-Menten reaction mechanism at high reactant concentration or the case if the reaction rate is the limiting step.) The velocity field  $\mathbf{u}(\mathbf{r})$  of the solution is governed by the Stokes equation  $-\nabla P + \eta\nabla^2\mathbf{u} = 0$ , where  $\eta$  is the viscosity of the solution and  $P(\mathbf{r})$  is the pressure field, along with the incompressibility condition  $\nabla \cdot \mathbf{u} = 0$ . For the velocity field, there is a no-slip boundary condition  $\mathbf{u}(\mathbf{r}) = 0$  at the planar wall. At the surface of the colloid, the boundary condition for  $\mathbf{u}$  is  $\mathbf{u}(\mathbf{r}) = \mathbf{U} + \mathbf{\Omega} \times (\mathbf{r} - \mathbf{r}_0) + \mathbf{v}_s$ , where  $\mathbf{r}_0$  is the position of the center of the sphere and  $\mathbf{r}$  is the position of a point on the surface of the particle, while far from the colloid the fluid is at rest. Finally, we require that the colloid, which moves by diffusiophoresis, is force and torque free [1–3], which fixes  $\mathbf{U}$  and  $\mathbf{\Omega}$ .

This formulation of the problem implicitly assumes several approximations. The first one is that we neglect any rotational diffusion effects, i.e., we assume that the rotational diffusion time is much larger than the timescales over which we study the motion. In using the Laplace equation for the number density, we have neglected convection and we have taken the number density to be quasi-static. This approximation is valid if the Peclet number  $Pe \equiv U_0R/D$  is small, where  $U_0$  is a characteristic particle velocity. In using the Stokes equation, we have neglected inertia of the solution, which is valid for small Reynolds number  $Re \equiv \rho U_0R/\eta$ , where  $\rho$  is the mass density of the solution. These characteristic numbers have been estimated as  $Re \approx 10^{-5}$  and  $Pe \approx 10^{-2}$  for a  $10 \mu\text{m}$  particle moving at  $1 \mu\text{m/s}$  and catalyzing the decomposition of  $\text{H}_2\text{O}_2$  into  $\text{H}_2\text{O}$  and  $\text{O}_2$  [3]. We also neglect any phoretic slip induced at the wall by the product. Finally, we assumed that the interfacial length scale  $\delta$  is small compared with the particle-surface gap distance; however, we note that for ionic interactions in aqueous solution the range of interaction can be up to hundreds of nm and therefore in this latter case the region of the phase plane where the assumptions of our model are expected to hold would be somewhat smaller, i.e.,  $h/R \simeq 1.4$  rather than the value 1.1 considered in the main text.

We express all lengths in units of the particle radius  $R$ ; the reaction product number density  $c(\mathbf{r})$  in units of  $c_0 = \kappa R/D$ ; the translational velocity in units of  $U_0 = |\kappa|/D$ ; and the angular velocity in units of  $\Omega_0 = U_0R$ .

In order to calculate numerically  $\mathbf{U}$  and  $\mathbf{\Omega}$  for a colloid configuration (i.e., position  $h$  and orientation  $\theta$ ), we take advantage of the fact that the number density of the solute and the velocity field  $\mathbf{u}(\mathbf{r})$  of the solution are coupled

solely through the phoretic slip boundary condition for  $\mathbf{u}$  at the surface of the colloid. Accordingly, we employ the following steps.

- (i) First, the number density  $c(\mathbf{r})$  is calculated by solving numerically the diffusion equation, subject to the corresponding boundary conditions, using the boundary element method (BEM) implemented with the BEMLIB library [4].
- (ii) Using the calculated  $c(\mathbf{r})$ , the phoretic slip  $\mathbf{v}_s = -b\nabla_{\parallel}c(\mathbf{r})$  is determined by numerical differentiation of  $c(\mathbf{r})$ .
- (iii)  $\mathbf{U}$  and  $\mathbf{\Omega}$  enter into the boundary conditions. Thus they can be fixed, by requiring that the particle is force- and torque-free, only after the solution of the Stokes equations has been determined. Therefore it is difficult to calculate them numerically by directly solving the initial problem. We shall circumvent this difficulty and determine them by employing the Lorentz reciprocal theorem, which relates the solutions of two distinct Stokes flow problems (called “primed” and “unprimed”) which share the same geometry but have different boundary conditions [5]. We proceed as follows:
- (iii)(a) According to the Lorentz reciprocal theorem, the fluid stresses  $(\boldsymbol{\sigma}, \boldsymbol{\sigma}')$  and the velocity fields  $(\mathbf{u}, \mathbf{u}')$  of the two problems are related by a surface integral over the fluid domain boundaries:

$$\int \mathbf{u} \cdot \boldsymbol{\sigma}' \cdot \mathbf{n} dS = \int \mathbf{u}' \cdot \boldsymbol{\sigma} \cdot \mathbf{n} dS. \quad (1)$$

The “unprimed” problem is the self-propelled particle under study, for which the boundary conditions are:  $\mathbf{u} = 0$  on the planar wall,  $\mathbf{u} = \mathbf{U} + \mathbf{\Omega} \times (\mathbf{r} - \mathbf{r}_0) + \mathbf{v}_s$  on the particle surface, and  $\mathbf{u} = 0$  at infinity. Note that  $\mathbf{v}_s$  has been determined in step (ii), and thus it is a known quantity.

Since there are six unknowns (the six components of the vectors  $\mathbf{U}$  and  $\mathbf{\Omega}$ ), six dual (“primed”) problems are needed. The choice of these problems is made such that, for the given geometry of the boundaries, they obey boundary conditions for which either the solution is known or can be computed numerically in a straightforward manner.

(iii)(b) The six primed problems (indexed by  $j = 1, \dots, 6$ ) which we consider are the translation with velocity  $U_0$  or the rotation with angular velocity  $\Omega_0 = U_0 R$  of a spherical particle of radius  $R$  through the fluid along each of the three directions  $\hat{x}$ ,  $\hat{y}$ , and  $\hat{z}$  at height  $h$  above the planar wall. Choosing  $j = 1, 2, 3$  to denote the cases of translation along the directions  $\hat{x}$ ,  $\hat{y}$ , and  $\hat{z}$ , respectively, and  $j = 4, 5, 6$  the corresponding cases of rotations along  $\hat{x}$ ,  $\hat{y}$ , and  $\hat{z}$  for a sphere moving through the fluid at constant height  $h$  above a planar wall, the problem  $j$  thus correspond to translational and rotational velocities  $(\mathbf{U}'_j, \mathbf{\Omega}'_j)$  as follows:

$$\begin{aligned} (\mathbf{U}'_{j=1}, \mathbf{\Omega}'_{j=1}) &= (U_0 \mathbf{e}_x, 0), \\ (\mathbf{U}'_{j=2}, \mathbf{\Omega}'_{j=2}) &= (U_0 \mathbf{e}_y, 0), \\ (\mathbf{U}'_{j=3}, \mathbf{\Omega}'_{j=3}) &= (U_0 \mathbf{e}_z, 0), \\ (\mathbf{U}'_{j=4}, \mathbf{\Omega}'_{j=4}) &= (0, \Omega_0 \mathbf{e}_x), \\ (\mathbf{U}'_{j=5}, \mathbf{\Omega}'_{j=5}) &= (0, \Omega_0 \mathbf{e}_y), \\ (\mathbf{U}'_{j=6}, \mathbf{\Omega}'_{j=6}) &= (0, \Omega_0 \mathbf{e}_z), \end{aligned} \quad (2)$$

where  $\mathbf{e}_{x,y,z}$  denote the unit vectors of the  $x$ ,  $y$ , and  $z$  directions, respectively. For each of the cases  $j = 1, \dots, 6$  we impose that the motion is subject to no-slip boundary conditions at the planar wall, i.e.,  $\mathbf{u}'_j = 0$  at the planar wall, and at the surface of the particle, i.e.,  $\mathbf{u}'_j = \mathbf{U}'_j + \mathbf{\Omega}'_j \times (\mathbf{r} - \mathbf{r}_0)$  at the particle surface, and that the fluid is quiescent far away from the particle, i.e.,  $\mathbf{u}'_j = 0$  at infinity. Each of the problems  $j = 1, \dots, 6$  as defined above can be straightforwardly solved numerically using the BEM [4] and therefore the corresponding fluid stresses  $\boldsymbol{\sigma}'_j$  and velocity fields  $\mathbf{u}'_j$ , are known quantities.

(iii)(c) We apply the Lorentz theorem (Eq. (1)) to each of the six pairs obtained by combining the unprimed problem with the problem  $j$ . Far away from the particle and at the planar wall both  $\mathbf{u}$  and  $\mathbf{u}'_j$  vanish so that concerning the integral over the whole boundary of the fluid domain only the part over the surface of the particle contributes. This leads to the following set of equations:

$$\int_{|\mathbf{r}|=R} \mathbf{u} \cdot \boldsymbol{\sigma}'_j \cdot \mathbf{n} dS = \int_{|\mathbf{r}|=R} \mathbf{u}'_j \cdot \boldsymbol{\sigma} \cdot \mathbf{n} dS, \quad j = 1, \dots, 6. \quad (3)$$

Upon inserting the boundary conditions  $\mathbf{u}'_j$  into Eq. (3), on its rhs one obtains

$$\int_{|\mathbf{r}|=R} [\mathbf{U}'_j + \boldsymbol{\Omega}'_j \times (\mathbf{r} - \mathbf{r}_0)] \cdot \boldsymbol{\sigma} \cdot \mathbf{n} dS.$$

We consider the two terms on the rhs in turn. For the translational term, we have

$$\int_{|\mathbf{r}|=R} \mathbf{U}'_j \cdot \boldsymbol{\sigma} \cdot \mathbf{n} dS = \mathbf{U}'_j \cdot \int_{|\mathbf{r}|=R} \boldsymbol{\sigma} \cdot \mathbf{n} dS = \mathbf{U}'_j \cdot \mathbf{F}, \quad (4)$$

where  $\mathbf{F} = \int_{|\mathbf{r}|=R} \boldsymbol{\sigma} \cdot \mathbf{n} dS$  is, by definition [5], the force exerted by the fluid on the self-propelled particle (plus its thin boundary layer of thickness  $\delta$ ). Since this is the only force acting on the particle, and since the self-propelled particle is force-free ( $\mathbf{F} = 0$ ), this term thus vanishes. For the rotational term, we have

$$\int_{|\mathbf{r}|=R} \boldsymbol{\Omega}'_j \times (\mathbf{r} - \mathbf{r}_0) \cdot \boldsymbol{\sigma} \cdot \mathbf{n} dS = \boldsymbol{\Omega}'_j \cdot \int_{|\mathbf{r}|=R} (\mathbf{r} - \mathbf{r}_0) \times \boldsymbol{\sigma} \cdot \mathbf{n} dS = \boldsymbol{\Omega}'_j \cdot \boldsymbol{\tau}. \quad (5)$$

Using the vector identity  $(\mathbf{a} \times \mathbf{b}) \cdot \mathbf{c} = \mathbf{a} \cdot (\mathbf{b} \times \mathbf{c})$  we have rearranged the integrand and identified the last integral with the torque exerted by the fluid on the self-propelled particle (plus its thin boundary layer of thickness  $\delta$ ) [5]. Since the self-propelled particle is torque-free ( $\boldsymbol{\tau} = 0$ ), the rotational term thus vanishes, too. Therefore, the entire right hand side of Eq. (3) is zero. Upon inserting the boundary conditions for  $\mathbf{u}$  into the lhs of Eq. (3), we obtain

$$\int_{|\mathbf{r}|=R} \mathbf{U} \cdot \boldsymbol{\sigma}'_j \cdot \mathbf{n} dS + \int_{|\mathbf{r}|=R} \boldsymbol{\Omega} \times (\mathbf{r} - \mathbf{r}_0) \cdot \boldsymbol{\sigma}'_j \cdot \mathbf{n} dS = - \int_{|\mathbf{r}|=R} \mathbf{v}_s \cdot \boldsymbol{\sigma}'_j \cdot \mathbf{n} dS. \quad (6)$$

Due to manipulations similar to the above ones, we obtain

$$\mathbf{U} \cdot \mathbf{F}'_j + \boldsymbol{\Omega} \cdot \boldsymbol{\tau}'_j = - \int_{|\mathbf{r}|=R} \mathbf{v}_s \cdot \boldsymbol{\sigma}'_j \cdot \mathbf{n} dS, \quad j = 1, \dots, 6, \quad (7)$$

with  $\mathbf{F}'_j = \int_{|\mathbf{r}|=R} \boldsymbol{\sigma}'_j \cdot \mathbf{n} dS$  and  $\boldsymbol{\tau}'_j = \int_{|\mathbf{r}|=R} (\mathbf{r} - \mathbf{r}_0) \times \boldsymbol{\sigma}'_j \cdot \mathbf{n} dS$ .  $\mathbf{F}'_j$  and  $\boldsymbol{\tau}'_j$  are the force and torque, respectively, exerted by the quiescent fluid on the particle in steady-state translation (or rotation) with a no-slip boundary condition on its surface. This state is possible only if the particle is driven; therefore  $\mathbf{F}'_j \neq 0$ ,  $\boldsymbol{\tau}'_j \neq 0$ .

Since  $\mathbf{v}_s$  (see (ii)) and the fluid stresses  $\boldsymbol{\sigma}'_j$  are known (from the numerical solution of each dual problem, see (iii)(b)), Eq. (7) provides a system of six linear equations for the six unknown translational ( $\mathbf{U}$ ) and rotational ( $\boldsymbol{\Omega}$ ) velocity components. This completes the calculation which in the end amounts to solving a system of six linear equations.

## II. CONTRIBUTION OF SOLUTE GRADIENTS TO PARTICLE ROTATION

Briefly, we show that for a particle with uniform surface mobility, gradients in solute density cannot directly contribute to the angular velocity of a spherical, self-diffusiophoretic particle. We use the reciprocal theorem for a particle in unconfined fluid. Without loss of generality, we take our dual (“primed”) problem to be a sphere rotating around the  $\hat{z}$  axis with angular velocity  $\Omega'_z$  in quiescent fluid. We wish to find the component of angular velocity  $\Omega_z$  of an unconfined particle in an arbitrary solute number density field  $c(\mathbf{r})$ . The torque on the rotating sphere is  $\tau'_z = -8\pi\eta R^3\Omega'_z$ :

$$-8\pi\eta R^3\Omega'_z\Omega_z = - \int_{|\mathbf{r}|=R} \mathbf{v}_s \cdot \boldsymbol{\sigma}' \cdot \mathbf{n} dS. \quad (8)$$

We introduce a spherical coordinate system centered on the particle center. Of the tangential components of the stress tensor,  $\sigma'_{\theta r} = 0$ , leaving only  $\sigma_{\phi r} = -3\eta\Omega'_z \sin(\theta)$  [6]. Invoking  $\mathbf{v}_s = -b(\mathbf{r})\nabla_{||}c(\mathbf{r})$ , we have:

$$8\pi\eta R^3\Omega'_z\Omega_z = \int_{|\mathbf{r}|=R} b(\mathbf{r}) \left( \frac{1}{R \sin(\theta)} \frac{\partial c}{\partial \phi} \right) (3\eta\Omega'_z \sin(\theta)) R^2 \sin(\theta) d\theta d\phi, \quad (9)$$

$$\Omega_z = \frac{3}{8\pi R} \int_{|\mathbf{r}|=R} b(\mathbf{r}) \left( \frac{\partial c}{\partial \phi} \right) \sin(\theta) d\theta d\phi. \quad (10)$$

If the surface mobility  $b(\mathbf{r})$  is uniform,  $b(\mathbf{r}) = b$ , then  $\Omega_z = 0$ , because  $c(\mathbf{r})$  is a single-valued function. Since the choice of rotation axis in the dual problem was arbitrary, we have  $\boldsymbol{\Omega} = 0$ .

These results are not surprising. Smoluchowski demonstrated that, for an (inert) spherical particle with uniform surface mobility in an unbounded fluid, a linearly varying solute density *externally* maintained cannot drive phoretic rotation of the particle [1]. This result was extended by Keh and Anderson for an arbitrarily varying external solute density [1].

In order to extend this rigorous analysis to the case of a planar wall detailed, careful consideration of Eq. (7) would be required because in the vicinity of a wall translation and rotation of a particle are hydrodynamically coupled. Nevertheless, one can acquire insight about the strength of the wall effects by examining the influence of the wall on the terms in Eq. (8), only.

We have shown that, in free space, the integral in Eq. (10) is zero for any distribution of solute, provided that the surface mobility of the particle is uniform. Hence, for a particle to rotate in the vicinity of a wall, the wall must modify the stress tensor  $\boldsymbol{\sigma}'$ . For a *rotating* sphere, the leading order, wall-induced contributions to  $\boldsymbol{\sigma}'$  stem from an image rotlet (point torque) and image stresslet [7]. The stress from these singularities decays as  $1/r^3$ . Hence, we anticipate that in the vicinity of a wall a contribution of the order  $1/h^3$  to the angular velocity of the particle may occur. This is consistent with the well-known fact that for a self-propelled sphere near a wall the sphere can rotate with an angular velocity proportional to  $1/h^3$  via the hydrodynamic interaction with the wall, i.e., the confinement of the disturbance flow created by the particle [8]. The reciprocal theorem (Eq. (7)) thus inherently captures the hydrodynamic interaction with the wall.

In order to determine whether wall-induced chemical gradients can rotate a particle, we must also consider the effect of the wall on  $\mathbf{v}_s$  through  $c(\mathbf{r})$ . At the simplest level, the effect of a wall on the solute density field can be modeled as an image point source of solute. Gradients from a point source decay as  $1/r^2$ , thus the image source changes the slip velocity by a term of the order  $1/h^2$ . Therefore, combining these two estimates, we anticipate that wall-induced chemical gradients could contribute to a rotation of the particle at order  $1/h^5$ , *but only through a coupling with the reflected flows*.

For  $h/R \geq 2$ , one has  $(R/h)^5 \leq 0.032$ , which can be regarded as negligible. Thus such contributions of the order  $(R/h)^5$  would be relevant only in the region very near the wall. Since we consider particle-wall separations as small as  $h/R = 1.1$ , for which  $(R/h)^5 \approx 0.62$ , further analysis is needed. Accordingly, in the next section, we consider a numerical decomposition of chemical and hydrodynamic contributions to the rotation of the particle.

### III. NUMERICAL IDENTIFICATION OF THE WALL CONTRIBUTIONS TO THE PARTICLE

#### MOTION

Equation (7) includes the effects of the wall in two distinct ways. The stress tensors  $\sigma'_j$  and the associated forces  $\mathbf{F}'_j$  and torques  $\tau'_j$  include the *hydrodynamic* effect of the wall (i.e., the consequences of imposing the no-slip boundary condition  $\mathbf{u} = 0$  at the wall), while the slip velocity  $\mathbf{v}_s$  at the particle surface includes the *chemical* effect of the wall (i.e., the consequences of imposing the no-flux condition  $\partial c/\partial n = 0$  at the wall). Via substitution of suitable alternatives (see below) for these quantities, we can identify the roles of the two effects in determining the particle motion. In order to identify the chemical effect of the wall, we can use as the dual problem a particle translating or rotating in free space, and substitute the free space stress tensor  $\sigma'^{fs}_j$  and the associated forces and torques into Eq. (7). In order to identify the hydrodynamic effect of the wall, one can calculate the slip velocity  $\mathbf{v}_s^{fs}$  for the active particle in free space, and substitute this quantity into the rhs of Eq. (7).

Now we consider the wall-induced chemical and hydrodynamic contributions to  $\dot{\theta} = -\Omega_x$  for half coverage ( $\chi_0 = 0$ ) (note that the minus sign is due to the definition of  $\theta$ , see Fig. 1(a) in the main text). Strikingly, the chemical contribution of the wall to rotation is orders of magnitude smaller than the hydrodynamic contribution (Fig. 1). This is expected from the theoretical arguments advanced in the previous section. Therefore the rotation appearing in the trajectories in Figs. (1)-(3) in the main text are solely due to the hydrodynamic interaction of the particle with the planar wall. In fact, because we expect the chemical contribution to be identically zero, Fig. 1(c) indicates the accuracy of our numerical scheme. For  $h/R$  close to the lower bound  $h/R = 1.1$ , the accuracy of the numerically predicted quantity  $\dot{\theta}/\Omega_0$  is of the order of  $10^{-5}$ . For  $h/R = 1.5$ , the accuracy increases to  $10^{-7}$ .

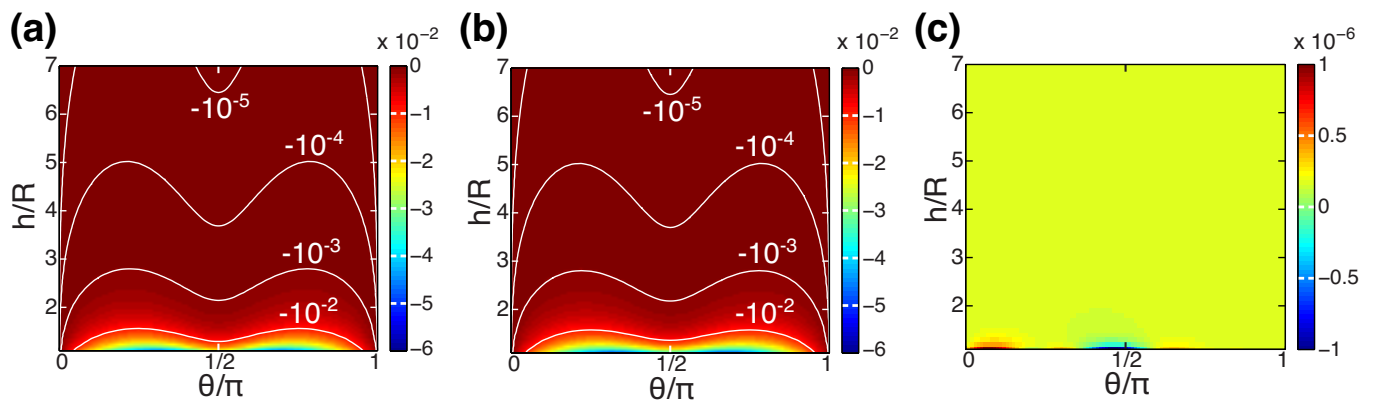

FIG. 1: (a)  $\dot{\theta}$  (in units of  $\Omega_0$ ) as function of the particle configuration  $(h/R, \theta)$  for half coverage ( $\chi_0 = 0$ ) (see the color code and the white lines of constant  $\dot{\theta}$ ). This plot includes both the chemical and hydrodynamic effects of the wall: since the wall is impenetrable to the product, it creates a gradient in number density; and since there is a no-slip condition at the wall, it reflects the disturbance flows created by the particle. (b) Plot of  $\dot{\theta}/\Omega_0$  which is obtained by using the free space slip velocity  $\mathbf{v}_s^{fs}$  in the context of the reciprocal theorem, i.e., neglecting the wall-induced effect on the product number density, but including the effect of the wall on the hydrodynamics. The plot, which is symmetric around  $\theta/\pi = 1/2$ , is virtually indistinguishable from (a). (c)  $\dot{\theta}/\Omega_0$  obtained by using the free space stress tensor  $\sigma'^{fs}_j$  in the reciprocal theorem, i.e., by neglecting the hydrodynamic effect of the wall, but including its effect on the number density. The angular velocity  $\dot{\theta}/\Omega_0$  is orders of magnitude lower than in (a) and (b). Thus we conclude that wall-induced number density gradients do not drive the rotation of the particle.

Furthermore, we note that Fig. 1(a) and Fig. 1(b) are symmetric around  $\theta = \pi/2$ . Nevertheless, the phase plane trajectories in Fig. 1(b) in the main text are clearly asymmetric. This asymmetry is due to the chemical effect of the wall on  $U_z$ . In Fig. 2, we show the phase plane for half coverage calculated with  $\mathbf{v}_s^{fs}$ , i.e., with the effect of the wall on the number density of solute neglected. These trajectories more closely resemble those obtained from theoretical models in which the surface slip is specified *a priori* [8, 9]. In particular, a particle initially facing the wall with an orientation  $\theta_0 = \pi/2 + \Delta\theta$  at a height  $h_0$  approaches the wall, reaches a turning point, and leaves the wall such that it has the orientation  $\theta = \pi/2 - \Delta\theta$  when it reaches the height  $h_0$  again. In comparison with Fig. 1(b) in the main text, the trajectories still fall into three classes of behavior: direct escape, initial approach to the wall and subsequent reflection, and “crashing”. However, the reflected trajectories do not evolve into a unique asymptotic orientation as  $t \rightarrow \infty$ , unlike those in the region  $\pi/2 < \theta < 0.7\pi$  in Fig. 1(b) in the main text, which end up with  $\theta \simeq \pi/2$ .

However, it should be noted that our method to decompose the angular velocity function  $\dot{\theta}(h, \theta)$  into hydrodynamic and chemical contributions is not exact. That is, for any particle surface chemistry, adding plots like those in Figs.

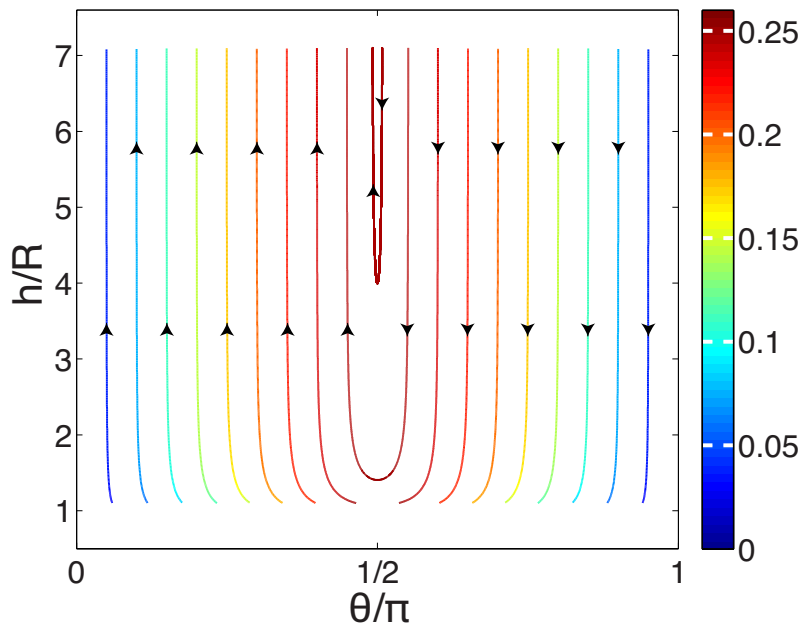

FIG. 2: Phase plane obtained for half coverage ( $\chi_0 = 0$ ) and using the free space slip velocity  $\mathbf{v}_s^{fs}$  in the reciprocal theorem, i.e., by neglecting the effect of the wall on the product number density. The trajectories of the particle are symmetric about  $\theta = \pi/2$ ; there is no specific orientation the scattered particle evolves to asymptotically, unlike  $\theta \simeq \pi/2$  in Fig. 1(b) in the main text. Color indicates  $U_y/U_0$ .

1(b) and (c) do not exactly reproduce a plot such as Fig. 1(a), even in the absence of numerical errors. One reason is that the wall-induced chemical gradient modifies the surface slip velocity, leading to a coupling of hydrodynamic and chemical effects at higher orders in  $1/h$ . We can estimate how the error associated with simply adding (b) and (c) scales with the particle height as follows.

As discussed in the previous section, the presence of a boundary which is impenetrable to the solute modifies the surface slip velocity with a contribution which decays as  $1/h^2$ . The surface slip distribution determines the strength of the hydrodynamic singularities which characterize how an active particle disturbs the surrounding fluid. For a force- and torque-free particle, the leading order hydrodynamic singularity is a force dipole. If the force dipole strength  $\alpha$  for an unconfined (free space) particle is  $\alpha_{fs}$ , then the strength in the presence of an impenetrable wall carries a correction  $\sim 1/h^2$ :  $\alpha \approx \alpha_{fs} + \alpha_2/h^2$ . In the presence of a no-slip boundary at the wall, the reflection of the disturbance flow created by a force dipole contributes to the vertical (wall normal) component of the particle velocity with an effect which decays as  $1/h^2$  [8]. Therefore, the contribution of the correction  $\alpha_2/h^2$  to the *vertical* velocity is expected to decay as  $1/h^4$ . On the other hand, the correction to the *angular* velocity is expected to decay as  $1/h^5$  as discussed in the previous section.

Accordingly, it is legitimate to ask how to recognize and assess the significance of higher order effects. They can be quantified by finding the difference between the complete angular velocity, (Fig. 1(a)), and the sum of the isolated contributions (Fig. 1(b) and Fig. 1(c)). However, since the chemical contribution is negligibly small, as shown in Fig. 1(c), we can directly compare Fig. 1(a) and Fig. 1(b). Except for being very close to the wall and near  $\theta = 90^\circ$ , the two functions are virtually identical. We conclude that rotation is driven largely by hydrodynamic interactions. A detailed study of higher order effects will be presented elsewhere.

#### IV. ANALYTICAL ESTIMATE OF HOVERING HEIGHT

We seek to obtain an expression for the equilibrium height  $h_{eq}$  of the hovering state as a function of the catalyst coverage  $\chi_0$ . Since for this state the particle catalyst coverage is very high, we expect the chemical effect of the wall to dominate the hydrodynamic interaction between the particle and the wall, which we therefore neglect.

The number density of solute created by the particle can be expressed in terms of a multipole expansion. The monopole term in this expansion captures the total flux of product emanating from the particle. Higher order terms are caused by the anisotropic distribution of catalyst on the surface of the particle. In order to impose the no-flux boundary condition at the wall, each term in the multipole expansion is associated with an image singularity located below the wall at  $z = -h$ , using the coordinate system of Fig. 1(a) in the main text.

We switch to a coordinate system in which the particle center is located at the origin, so that the image singularities are located at  $z = -2h$ . In the present context we restrict our attention to the image *monopole*. The contribution of this singularity to the full number density is

$$c_m^*(\mathbf{r}) = \frac{\dot{m}}{4\pi D|\mathbf{r} + 2h\hat{\mathbf{z}}|}, \quad (11)$$

where  $\dot{m}$  is the total flux of product from the particle surface,  $\hat{\mathbf{z}}$  is the normal of the planar wall, and the asterisk indicates that this is an image singularity. The total flux  $\dot{m}$  is related to the coverage parameter by  $\dot{m} = 2\pi R^2 \kappa(1 + \chi_0)$ , so that

$$c_m^*(\mathbf{r}) = \frac{\kappa R^2(1 + \chi_0)}{2D|\mathbf{r} + 2h\hat{\mathbf{z}}|}. \quad (12)$$

Now we seek the surface gradient  $\nabla_{||} c_m^*(\mathbf{r})$ . Invoking the rotational symmetry around the  $\hat{\mathbf{z}}$  axis (i.e.,  $c_m^*$  does not depend on the azimuthal angle  $\phi$ ), the surface gradient is  $\nabla_{||} c_m^*(\mathbf{r}) = [\nabla c_m^*(\mathbf{r}) \cdot \mathbf{e}_\vartheta] \mathbf{e}_\vartheta$ , where  $\vartheta$  denotes the polar angle in spherical coordinates and  $\mathbf{e}_\vartheta$  is the unit vector corresponding to the  $\vartheta$  direction. We obtain

$$\nabla_{||} c_m^*(\mathbf{r}) = \left( \frac{-\kappa R^2(1 + \chi_0)(\mathbf{r} + 2h\hat{\mathbf{z}}) \cdot \mathbf{e}_\vartheta}{2D|\mathbf{r} + 2h\hat{\mathbf{z}}|^3} \right) \mathbf{e}_\vartheta = \frac{h\kappa R^2(1 + \chi_0)}{D|\mathbf{r} + 2h\hat{\mathbf{z}}|^3} (\sin \vartheta) \mathbf{e}_\vartheta, \quad (13)$$

where the second equality follows from the fact that  $\mathbf{r}$  and  $\mathbf{e}_\vartheta$  are orthogonal and  $\hat{\mathbf{z}} \cdot \mathbf{e}_\vartheta = -\sin \vartheta$ .

In order to evaluate the velocity of the particle along the  $\hat{\mathbf{z}}$  direction we apply the reciprocal theorem (Eq. (7)). For analytical tractability, in the dual problem we use the stress tensor  $\boldsymbol{\sigma}'$  for a particle moving with velocity  $U'_z$  in the  $\hat{\mathbf{z}}$  direction in free space. This is an approximation which we expect to be valid far from the wall. In this case, on the lhs of Eq. (7) there is no torque exerted by the fluid on the particle, i.e.,  $\boldsymbol{\tau}' = 0$ , while the force  $\mathbf{F}'$  exerted by the fluid on the particle is simply given by the Stokes formula for a sphere,  $\mathbf{F}' = -6\pi\eta R U'_z \hat{\mathbf{z}}$  [5]. One therefore obtains

$$-6\pi\eta R U'_z U_z^{*,m} = - \int_{|\mathbf{r}|=R} \mathbf{v}_s \cdot \boldsymbol{\sigma}' \cdot \mathbf{n} dS, \quad (14)$$

where  $U_z^{*,m}$  is the velocity component we wish to obtain (the superscript  $(*, m)$  being a reminder that the velocity  $U_z$  is calculated by using an approximation of the wall effect on the number density which accounts only for the image monopole). The slip velocity induced by the image monopole is  $\mathbf{v}_{s,m}^* = -b \nabla_{||} c_m^*(\mathbf{r})$  (for a uniform phoretic mobility  $b(\mathbf{r}) = b$ ). Since according to Eq. (13) the slip velocity has only a component in the direction of  $\mathbf{e}_\vartheta$  while the normal to the surface of the sphere is along the radial direction,  $\hat{\mathbf{n}} = \hat{\mathbf{r}} = \mathbf{r}/r$ , only the component  $\sigma'_{r,\vartheta}$  of the stress tensor  $\boldsymbol{\sigma}'$ , evaluated at the surface of the sphere, is relevant for the integral on the rhs of Eq. (14). For a sphere translating

with velocity  $U'_z$  through an unbounded fluid  $\sigma'_{r\vartheta}(R, \vartheta) = 3\eta U'_z \sin \vartheta / (2R)$  [5, 10], and thus we obtain

$$6\pi\eta R U'_z U_z^{*,m} = - \int_0^\pi d\vartheta \left[ \frac{bh\kappa R^2(1+\chi_0)}{D|R\hat{\mathbf{r}} + 2h\hat{\mathbf{z}}|^3} \sin \vartheta \right] \left( \frac{3\eta U'_z}{2R} \sin \vartheta \right) 2\pi R^2 \sin \vartheta, \quad (15)$$

which implies

$$\begin{aligned} U_z^{*,m} &= - \int_0^\pi d\vartheta \frac{bh\kappa R^2(1+\chi_0)}{2D|R\hat{\mathbf{r}} + 2h\hat{\mathbf{z}}|^3} (\sin \vartheta)^3 \\ &= - \frac{b\kappa R^2(1+\chi_0)}{2Dh^2} \int_0^\pi d\vartheta \frac{(\sin \vartheta)^3}{[4 + 4(R/h) \cos \vartheta + (R/h)^2]^{3/2}} \\ &\stackrel{(R/h \leq 1)}{=} - \frac{b\kappa R^2(1+\chi_0)}{12Dh^2} = - \frac{R^2(1+\chi_0)}{12h^2} U_0 \operatorname{sgn}(b). \end{aligned} \quad (16)$$

At the equilibrium height  $h_{eq}$  this contribution balances the free space velocity  $U_{fs} = [(1 - \chi_0^2)/4] U_0 \operatorname{sgn}(b)$ , so that

$$h_{eq}/R = [3(1 - \chi_0)]^{-1/2}. \quad (17)$$

## V. NONUNIFORM SURFACE MOBILITIES

In this section we concisely discuss how small to moderate deviations from the case of uniform mobilities, i.e.,  $\beta := b_{\text{inert}}/b_{\text{cap}} \neq 1$  but close to 1, affect the steady states determined at  $\beta = 1$ . A detailed study of the phenomenology for  $\beta \neq 1$ , including the case  $\beta < 0$ , will be presented elsewhere.

### A. Effect on sliding and hovering states

We consider whether the sliding and hovering states previously obtained for  $\beta = 1$  persist for  $\beta$  deviating from  $\beta = 1$ . Varying  $\beta$  for  $\chi_0 = 0.4$ ,  $\chi_0 = 0.5$ , and  $\chi_0 = 0.6$  we find that, for each degree of coverage, there is a nonzero interval of  $\beta \simeq 1$  within which sliding does occur (see Fig. 3). The size and the location of this interval varies

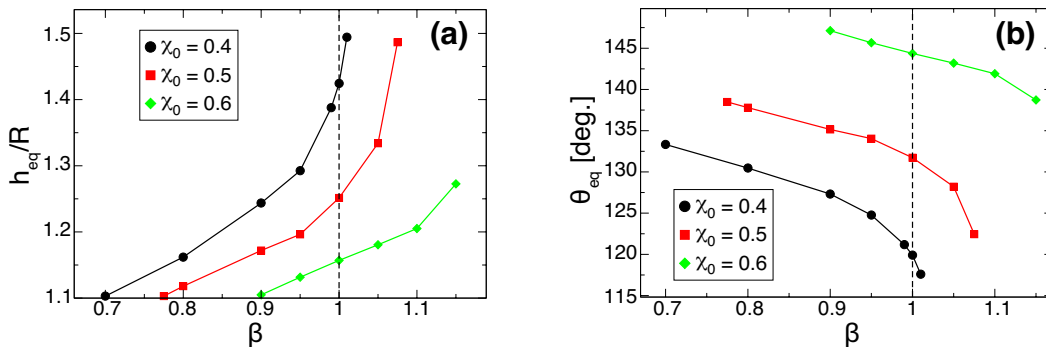

FIG. 3: (a) Variation of the sliding height  $h_{eq}/R$  as function of  $\beta = b_{\text{inert}}/b_{\text{cap}}$  for three catalyst coverages  $\chi_0$ . For each  $\chi_0$ , there is an interval of  $\beta$  with upper and lower bounds for sliding to occur. Slightly beyond the farmost right data points there are no sliding states. It is unclear whether there is a genuine maximum size of this interval, because  $h_{eq}/R$  approaches the phase space cutoff  $h/R = 1.1$  as  $\beta$  decreases. In any case there is a nonvanishing interval of  $\beta$ , containing  $\beta = 1$ , within which the sliding states do occur. (b) Variation of the sliding orientation  $\theta_{eq}$  as function of  $\beta$  for the same three catalyst coverages as in (a).

with coverage. For instance, for  $\chi_0 = 0.4$ ,  $\beta = 1.01$  is the largest value of  $\beta$  for which sliding occurs. (There is no sliding attractor for  $\beta = 1.02$ ; thus the exact value of the upper bound of the interval lies between  $\beta = 1.01$  and  $\beta = 1.02$ .) On the other hand, for  $\chi_0 = 0.6$  sliding occurs for  $\beta$  as large as  $\beta = 1.15$ . As expected, the height  $h_{eq}$  and the angle  $\theta_{eq}$  for sliding vary as a function of  $\beta$ . As  $\beta$  decreases,  $h_{eq}$  decreases. Eventually,  $h_{eq}/R$  reaches  $h/R = 1.1$ , which is the cutoff of the region of phase space we consider. It is therefore uncertain whether there is a genuine lower bound on  $\beta$  for sliding.

Concerning the hovering states, we have considered  $\chi_0 = 0.85$ ,  $\chi_0 = 0.9$ , and  $\chi_0 = 0.95$ , with  $\beta \in [0, 1.5]$ . We have not found any genuine bounds for hovering within this interval of  $\beta$ . However, as for sliding,  $h_{eq}$  for hovering depends on  $\beta$  such that it decreases upon increasing  $\beta$  and finally reaches the cutoff  $h/R = 1.1$ .

### B. Identification of chemical and hydrodynamic wall effects

In Section III we outlined how to separate the hydrodynamic and chemical contributions to the angular velocity  $\dot{\theta}$  of a self-propelled particle. The method consists of employing in the calculation of the translational and angular velocities  $\mathbf{U}$  and  $\mathbf{\Omega}$  either (i) a prescribed distribution of slip velocities around the particle given by that corresponding to the self-phoresis of the same particle with the same orientation  $\theta$  in free space [10], i.e.,  $\mathbf{v}_s(\mathbf{r}) = \mathbf{v}_s^{fs}(\mathbf{r})$ , or (ii) a prescribed hydrodynamic stress tensor given by that corresponding to a sphere moving through an unbounded fluid [5]. Here we have repeated this analysis for half coverage ( $\chi_0 = 0$ ) and unequal cap and inert surface mobilities, i.e.,  $\beta \neq 1$ . Figure 4 shows such results for  $\beta = 0.9$ .

It is interesting to directly compare Figs. 1 and 4 which correspond to  $\beta = 1$  and  $\beta = 0.9$ , respectively. For these two cases, the hydrodynamic contributions to  $\dot{\theta}$ , shown in Figs. 1(b) and 4(b), are similar and negative everywhere in the region  $0 < \theta < \pi$ . However, for  $\beta = 0.9$  the chemical contributions to rotation are no longer negligible (which is

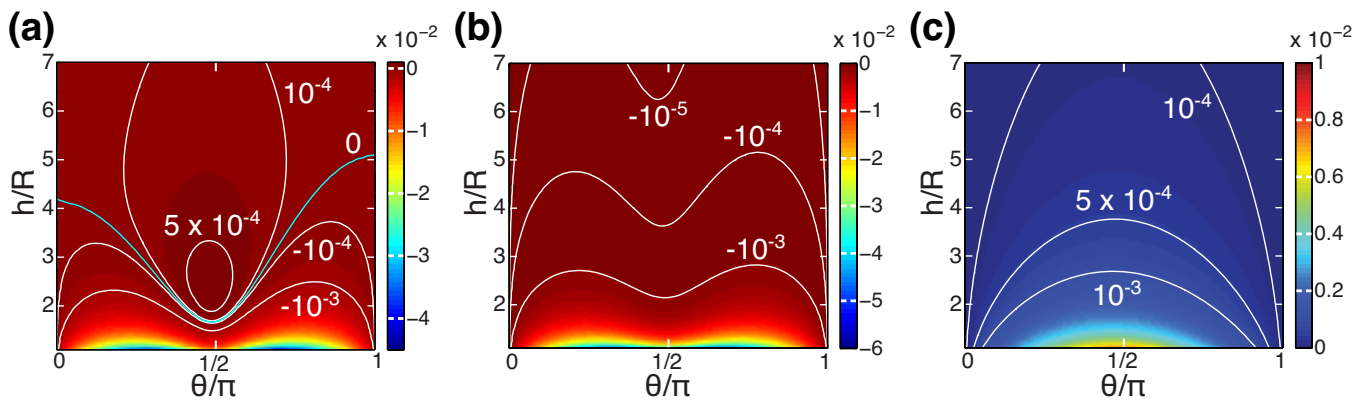

FIG. 4: (a) Angular velocity  $\dot{\theta}/\Omega_0$  as a function of height  $h/R$  and orientation  $\theta$  for half coverage ( $\chi_0 = 0$ ) and unequal surface mobilities:  $\beta = b_{\text{inert}}/b_{\text{cap}} = 0.9$ . Throughout, white curves correspond to constant values of  $\dot{\theta}$ . In contrast to the case  $\chi_0 = 0$  and  $\beta = 1$  [Fig. 1(a)], here there exists a curve (shown in cyan color) along which  $\dot{\theta} = 0$ . (b) Angular velocities  $\dot{\theta}/\Omega_0$  obtained by using in the reciprocal theorem the free space phoretic slip  $\mathbf{v}_s^{fs}$  around the particle, i.e., neglecting the influence of the wall on the number density of solute but including the influence of the wall on the hydrodynamic flow. (c)  $\dot{\theta}/\Omega_0$  obtained by using the corresponding free space hydrodynamics stress tensor of a translating or rotating sphere in each of the  $j = 1 \dots 6$  dual problems employed in the reciprocal theorem, i.e., neglecting the effect of the wall on the hydrodynamics but including the chemical effect. In strong contrast to the results shown in Fig. 1(c), here due to  $\beta \neq 1$  chemical gradients created by the wall significantly drive the rotation of the particle.

in line with the fact that for  $\beta \neq 1$  Smoluchowski's result for  $b(\mathbf{r}) = \text{const}$  [1] does not apply), and they are positive everywhere for  $0 < \theta < \pi$  [Fig. 4(c)]. On the cyan curve in Fig. 4(a), the two contributions to rotation are in balance, i.e.,  $\dot{\theta} = 0$ .

As previously discussed, we do not expect Fig. 4(b) and Fig. 4(c) to exactly sum to Fig. 4(a), owing to coupling between chemical and hydrodynamic effects at  $\mathcal{O}(h^{-4})$ . Since the chemical contribution is no longer negligible for  $\beta \neq 1$ , we can inspect the accuracy of our approach of decomposing the hydrodynamic and chemical effects by comparing the sum of Fig. 4(b) and Fig. 4(c) with Fig. 4(a). The sum of the two individually isolated contributions is shown in Fig. 5. The resulting reconstructed angular velocity function strongly resembles Fig. 4(a), which includes coupling between chemical and hydrodynamic effects, and was used to integrate the trajectories in Fig. 4 of the main text. We stress that all trajectories and phase plots in the main text include coupling between chemical and hydrodynamic effects.

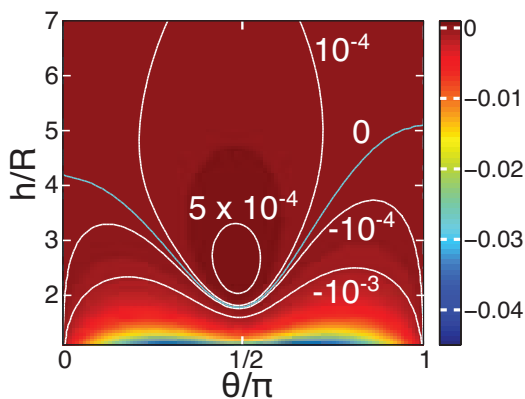

FIG. 5: The sum of Fig. 4(b) and Fig. 4(c), the individually isolated hydrodynamic and chemical contributions to rotation of a particle with  $\beta = 0.9$  and  $\chi_0 = 0$ . The resulting angular velocity function is very similar to Fig. 4(a), the angular velocity function obtained when the two contributions are not separated, i.e. via the numerical method used to obtain the figures in the main text.

- 
- [1] J. L. Anderson, *Ann. Rev. Fluid Mech.* **21**, 61 (1989).
  - [2] R. Golestanian, T. B. Liverpool, and A. Ajdari, *Phys. Rev. Lett.* **94**, 220801 (2005).
  - [3] M. N. Popescu, S. Dietrich, M. Tasinkevych, and J. Ralston, *Eur. Phys. J. E* **31**, 351 (2010).
  - [4] C. Pozrikidis, *A Practical Guide to Boundary Element Methods with the Software Library BEMLIB* (CRC Press, Boca Raton, 2002).
  - [5] J. Happel and H. Brenner, *Low Reynolds Number Hydrodynamics* (Prentice-Hall, Englewood Cliffs, NJ, 1965).
  - [6] W. M. Deen, *Analysis of Transport Phenomena* (Oxford University Press, New York,, 1998).
  - [7] J. R. Blake and A. T. Chwang, *J. Eng. Math.* **8**, 23 (1974).
  - [8] S. Spangolie and E. Lauga, *J. Fluid Mech.* **700**, 105 (2012).
  - [9] K. Ishimoto and E. A. Gaffney, *Phys. Rev. E* **88**, 062702 (2013).
  - [10] R. Golestanian, T. B. Liverpool, and A. Ajdari, *New J. Phys.* **9**, 126 (2007).
